# Supplementary material
Source: publisher figshare collection journal article supplement (https://rs.figshare.com/ndownloader/files/14118107)
Supplement: Supplementary file 1 [file 14118107]

**Supplementary material for ‘*Convergent evolution of reduced eggshell conductance in avian brood parasites’***

Stephanie C. McClelland, Gabriel A. Jamie, Katy Waters, Lara Caldas, Claire N. Spottiswoode and Steven J. Portugal

**Additional analyses with exclusion of species with small sample sizes**

1. **PGLS model excluding African quailfinch**

In order to address the issue of small sample sizes, the analyses were rerun excluding species where only a single egg was available. In the case of the PGLS model of eggshell conductance of shell fragments predicted by parasitic status, only the African quailfinch was excluded, as only a single sufficiently large shell fragment was available. This did not change the significance of the factors included in the average model (see Tables S3–S5 below).

**Table S3.** Model support table (AICc) for the top-ranked PGLS models (model weight >0.05) of *G*H2O which contribute to the average model.

| Model no. and predictor variables | df | logLik | AICc | Delta AICc | weight |
| --- | --- | --- | --- | --- | --- |
| 1 Parasite status  Shell thickness  Parasite status*Shell thickness | 5 | -12.11 | 36.3 | 0 | 0.25 |
| 2 Shell thickness  Wet parent | 3 | -14.86 | 36.49 | 0.19 | 0.23 |
| 3 Breeding latitude  Shell thickness  Wet parent | 4 | -14.05 | 37.44 | 1.14 | 0.14 |
| 4 Parasite status  Shell thickness  Wet parent  Breeding latitude  Parasite status*Shell thickness | 6 | -11.26 | 37.52 | 1.22 | 0.14 |
| 5 Shell thickness | 2 | -16.6 | 37.58 | 1.28 | 0.13 |
| 6 Parasite status  Shell thickness  Breeding latitude  Parasite status*Shell thickness | 5 | -12.99 | 38.05 | 1.75 | 0.11 |

**Table S4.** Model output of conditional averaged PGLS model predicting *G*H2O of eggshells fragments. * indicates *P* < 0.05

|  | Estimate | Std. Error | z value | *P* |
| --- | --- | --- | --- | --- |
| (Intercept) | -0.56623 | 0.304086 | 1.862 | 0.0626 |
| Parasite status | -1.60934 | 0.724134 | 2.222 | 0.0263 * |
| Shell thickness | -4.265344 | 1.789727 | 2.383 | 0.0172 * |
| Wet parent | -0.551965 | 0.30914 | 1.785 | 0.0742 |
| Parasite status*Shell thickness | 16.385773 | 7.804396 | 2.1 | 0.0358 * |
| Breeding latitude | -0.004312 | 0.003467 | 1.244 | 0.2135 |

**Table S5.** Importance weighting and number of containing models of predictor variables in PGLS analysis

| Variable | Shell thickness | Wet parent | Parasite status | Parasite status * Shell thickness | Breeding latitude |
| --- | --- | --- | --- | --- | --- |
| Importance | 1.00 | 0.76 | 0.50 | 0.50 | 0.39 |
| N models containing variable | 6 | 4 | 3 | 3 | 3 |

1. **Host-parasite comparison with species of n=1 removed**

We reperformed the analysis between the GH2O of host species and brood parasites with the exclusion of species for which we had a sample size of 1. Two species were removed from the whole egg dataset and six from the fragment dataset. This had minimal effect on the results of the comparative analysis between host and parasite *G*H2O. However, due to the increased ‘weight’ of the cowbird and host pair (for which the trend was reversed) in the model, parasite status was marginally non-significant. When the cowbird was also removed, there was a significant effect of parasite status on *G*H2O (*P*= 0.02) (see Table S6 below).

**Table S6.** Comparisons of host and parasite *G*H2O with the exclusion of species with n=1. All tests are Welch’s (unequal variance) two-sample *t*-tests. * indicates *P* < 0.05

|  | Mean (parasite) | Mean  (host) | 95% C.I. | *t* | d.f. | *P* |
| --- | --- | --- | --- | --- | --- | --- |
| ***Fragment samples with 6 species with n=1 removed:*** |  |  |  |  |  |  |
| *G*H2O (not corrected by weight) | 0.42 | 0.77 | [0.030, 0.663] | 2.87 | 4.7 | 0.04 * |
| *G*H2O per gram egg weight | 0.20 | 0.86 | [0.219, 1.107] | 3.85 | 4.9 | 0.01 * |
| ***Whole egg analysis with 2 species with n=1 removed:*** |  |  |  |  |  |  |
| *G*H2O (not corrected by weight) | 0.77 | 1.28 | [-0.028, 1.047] | 2.05 | 12.8 | 0.06 |
| *G*H2O per gram egg weight | 0.50 | 0.25 | [0.093, 0.406] | 3.53 | 10.8 | 0.005 * |
| *G*H2O (not corrected by weight) with Brown-headed cowbird also removed | 0.71 | 1.37 | [0.087, 1.231] | 2.54 | 11.0 | 0.03 * |
| *G*H2O per gram egg weight, with Brown-headed cowbird also removed | 0.24 | 0.52 | [0.121 , 0.453] | 3.88 | 9.6 | 0.003 * |
